# MIND TO MIND

Creative writing that explores the abstract side of our profession and our lives

*Stephen T. Harvey, M.D., Editor*

## Q&A in the OR

Nathaniel J. Brown, M.D., Ph.D.

The sharp, green waves  
and staccato beeps sing  
your heart rate from my monitor—  
a background sound so familiar  
it seeps into me without effort.  
But, while you're drifting under,  
the sounds, and the waves,  
change abruptly: a new rhythm.  
It is your first question, and it's urgent.

I answer with a question, too:  
a push from a syringe,  
and a whisper of encouragement.

You say nothing at first,  
instead, slowing, pausing...too long—  
this conversation can't be over.

I push on your chest  
firmly, but gently.  
I need to help

Accepted for publication May 13, 2022. Published online first on June 1, 2022.

Nathaniel J. Brown, M.D., Ph.D.: Rocky Mountain Regional VA Medical Center, University of Colorado School of Medicine, Aurora, Colorado. [nathaniel.j.brown@ucdenver.edu](mailto:nathaniel.j.brown@ucdenver.edu)

Permission to reprint granted to the American Society of Anesthesiologists by copyright author/owner. *Anesthesiology* 2022; 137:364–5. DOI: 10.1097/ALN.0000000000004278

your failing heart.  
It just wants a touch,  
some external coaxing.

I wait, anxious, for your response.  
I hope it doesn't show.  
Is this the end? How hard will it be?

Your eventual answer, which I liked,  
and the time it took to give, which I liked less,  
foretell the day's many ups and downs.

It's just the beginning  
of our discussion.  
We'll both have more questions.
